# Supplementary material for: Development of Spatiotemporal Whole-Stem Models for Estimating End-Product-Based Fibre Attribute Determinates for Jack Pine and Red Pine
Source: MDPI journal article supplement (doi:10.3390/f14112211), 2023-11-08
Supplement: s1 [file s1]

**Table S1a.** Cross-sectional position-based mensurational metrics for the 610 jack pine disk samples.

| Metric                        | Relative height class <sup>a</sup> (%) | Number of disks | Mean  | Median | Minimum | Maximum | CV <sup>b</sup> (%) |
|-------------------------------|----------------------------------------|-----------------|-------|--------|---------|---------|---------------------|
| Cambial age (yr)              | 1 (SH)                                 | 61              | 62    | 54     | 47      | 74      | 15.5                |
|                               | 6 (BH)                                 | 61              | 59    | 51     | 47      | 71      | 15.8                |
|                               | 10                                     | 61              | 57    | 50     | 45      | 69      | 15.9                |
|                               | 20                                     | 61              | 55    | 49     | 43      | 65      | 14.5                |
|                               | 30                                     | 61              | 50    | 43     | 40      | 62      | 17.4                |
|                               | 40                                     | 61              | 47    | 41     | 37      | 58      | 15.5                |
|                               | 50                                     | 61              | 42    | 36     | 31      | 54      | 18.5                |
|                               | 60                                     | 61              | 38    | 34     | 28      | 50      | 17.7                |
|                               | 70                                     | 61              | 31    | 26     | 19      | 46      | 24.2                |
|                               | 80                                     | 61              | 25    | 23     | 12      | 42      | 31.4                |
| Stem height (m)               | 1 (SH)                                 | 61              | 0.19  | 0.20   | 0.02    | 0.29    | 25.7                |
|                               | 6 (BH)                                 | 61              | 1.30  | 1.30   | 1.30    | 1.30    | 0.0                 |
|                               | 10                                     | 61              | 2.35  | 2.34   | 1.93    | 2.72    | 7.9                 |
|                               | 20                                     | 61              | 4.50  | 4.53   | 3.71    | 5.22    | 7.7                 |
|                               | 30                                     | 61              | 6.64  | 6.72   | 5.45    | 7.56    | 7.6                 |
|                               | 40                                     | 61              | 8.78  | 8.90   | 7.19    | 10.00   | 7.5                 |
|                               | 50                                     | 61              | 10.92 | 11.09  | 8.89    | 12.46   | 7.6                 |
|                               | 60                                     | 61              | 13.06 | 13.28  | 10.47   | 14.91   | 7.6                 |
|                               | 70                                     | 61              | 15.20 | 15.48  | 12.07   | 17.36   | 7.7                 |
|                               | 80                                     | 61              | 17.33 | 17.62  | 13.65   | 19.80   | 7.8                 |
| Relative stem height (%)      | 1 (SH)                                 | 61              | 0.88  | 0.89   | 0.07    | 1.32    | 25.0                |
|                               | 6 (BH)                                 | 61              | 6.04  | 5.96   | 5.29    | 7.09    | 7.0                 |
|                               | 10                                     | 61              | 10.86 | 10.90  | 9.75    | 13.01   | 3.9                 |
|                               | 20                                     | 61              | 20.80 | 20.78  | 18.18   | 24.96   | 3.4                 |
|                               | 30                                     | 61              | 30.70 | 30.74  | 26.68   | 34.45   | 2.7                 |
|                               | 40                                     | 61              | 40.59 | 40.71  | 35.18   | 43.87   | 2.4                 |
|                               | 50                                     | 61              | 50.49 | 50.64  | 43.68   | 53.60   | 2.3                 |
|                               | 60                                     | 61              | 60.41 | 60.60  | 52.26   | 63.01   | 2.3                 |
|                               | 70                                     | 61              | 70.26 | 70.54  | 60.77   | 72.80   | 2.4                 |
|                               | 80                                     | 61              | 80.11 | 80.48  | 69.34   | 83.28   | 2.5                 |
| Cross-sectional diameter (cm) | 1 (SH)                                 | 61              | 23.21 | 22.61  | 15.71   | 31.88   | 13.6                |
|                               | 6 (BH)                                 | 61              | 20.49 | 20.37  | 14.73   | 26.97   | 14.3                |
|                               | 10                                     | 61              | 19.47 | 19.39  | 13.70   | 26.89   | 14.1                |
|                               | 20                                     | 61              | 18.93 | 19.03  | 13.07   | 24.42   | 13.2                |

---

|    |    |       |       |       |       |      |
|----|----|-------|-------|-------|-------|------|
| 30 | 61 | 16.95 | 17.03 | 10.89 | 21.74 | 14.4 |
| 40 | 61 | 16.64 | 16.59 | 11.81 | 20.86 | 12.9 |
| 50 | 61 | 14.37 | 14.56 | 9.41  | 19.22 | 15.4 |
| 60 | 61 | 13.87 | 13.88 | 9.99  | 18.67 | 14.0 |
| 70 | 61 | 11.29 | 11.03 | 7.54  | 15.69 | 17.3 |
| 80 | 61 | 8.61  | 8.45  | 4.64  | 13.60 | 21.3 |

---

<sup>a</sup> Relative stem height position where SH and BH refer to stump height and breast-height, respectively. <sup>b</sup>  
Coefficient of variation.

**Table S1b.** Cross-sectional position-based mensurational metrics for the 223 red pine disk samples.

| Metric                        | Relative height class mid-point <sup>a</sup> (%) | Number of disks | Mean  | Median | Minimum | Maximum | CV <sup>b</sup> (%) |
|-------------------------------|--------------------------------------------------|-----------------|-------|--------|---------|---------|---------------------|
| Cambial age (yr)              | 7.5                                              | 54              | 77    | 77     | 73      | 81      | 3.0                 |
|                               | 22.5                                             | 55              | 61    | 62     | 53      | 67      | 4.5                 |
|                               | 37.5                                             | 24              | 53    | 53     | 45      | 58      | 5.4                 |
|                               | 52.5                                             | 24              | 40    | 40     | 30      | 46      | 8.8                 |
|                               | 67.5                                             | 39              | 31    | 32     | 24      | 39      | 12.8                |
|                               | 82.5                                             | 27              | 20    | 19     | 14      | 27      | 19.1                |
| Stem height (m)               | 7.5                                              | 54              | 0.25  | 0.30   | 0.12    | 0.30    | 22.4                |
|                               | 22.5                                             | 55              | 5.25  | 5.15   | 5.10    | 8.06    | 7.5                 |
|                               | 37.5                                             | 24              | 10.33 | 10.31  | 10.12   | 10.71   | 1.3                 |
|                               | 52.5                                             | 24              | 15.03 | 15.29  | 13.14   | 16.19   | 5.1                 |
|                               | 67.5                                             | 39              | 18.74 | 18.20  | 15.14   | 21.91   | 8.3                 |
|                               | 82.5                                             | 27              | 22.35 | 22.52  | 19.51   | 24.62   | 6.2                 |
| Relative stem height (%)      | 7.5                                              | 54              | 0.91  | 1.02   | 0.48    | 1.12    | 21.1                |
|                               | 22.5                                             | 55              | 18.93 | 18.73  | 17.17   | 28.57   | 8.6                 |
|                               | 37.5                                             | 24              | 38.00 | 37.48  | 34.45   | 43.32   | 5.0                 |
|                               | 52.5                                             | 24              | 54.98 | 54.97  | 47.12   | 59.59   | 5.7                 |
|                               | 67.5                                             | 39              | 68.41 | 68.05  | 60.04   | 75.00   | 6.7                 |
|                               | 82.5                                             | 27              | 82.54 | 82.60  | 76.27   | 90.65   | 4.4                 |
| Cross-sectional diameter (cm) | 7.5                                              | 54              | 35.98 | 35.14  | 30.53   | 42.96   | 9.7                 |
|                               | 22.5                                             | 55              | 28.71 | 28.11  | 19.01   | 35.87   | 13.5                |
|                               | 37.5                                             | 24              | 24.95 | 24.45  | 19.02   | 35.31   | 16.7                |
|                               | 52.5                                             | 24              | 21.24 | 21.14  | 13.34   | 30.11   | 18.7                |
|                               | 67.5                                             | 39              | 17.76 | 17.55  | 13.34   | 23.78   | 15.1                |
|                               | 82.5                                             | 27              | 9.74  | 9.39   | 5.18    | 14.63   | 27.8                |

<sup>a,b</sup> as defined in Table S1a.

**Table S2a.** Descriptive statistical summary of the jack pine fibre attributes by cross-sectional relative height sampling position.

| Attribute                                  | Relative height <sup>a</sup> position (%) | Mean   | Median | Minimum | Maximum | CV <sup>b</sup> (%) |
|--------------------------------------------|-------------------------------------------|--------|--------|---------|---------|---------------------|
| Wood density ( $W_d$ ; kg/m <sup>3</sup> ) | 1 (SH)                                    | 446.86 | 450.30 | 371.80  | 532.95  | 7.8                 |
|                                            | 6 (BH)                                    | 437.94 | 440.91 | 358.11  | 509.42  | 7.1                 |
|                                            | 10                                        | 430.36 | 421.61 | 372.88  | 489.66  | 6.5                 |
|                                            | 20                                        | 428.20 | 424.58 | 347.91  | 494.99  | 6.6                 |
|                                            | 30                                        | 416.45 | 418.68 | 337.88  | 481.99  | 6.6                 |
|                                            | 40                                        | 414.45 | 414.90 | 347.95  | 475.42  | 6.7                 |
|                                            | 50                                        | 407.46 | 405.88 | 359.76  | 467.79  | 6.0                 |
|                                            | 60                                        | 403.67 | 399.50 | 353.55  | 462.54  | 5.7                 |
|                                            | 70                                        | 394.67 | 391.74 | 356.95  | 442.25  | 5.1                 |
|                                            | 80                                        | 388.91 | 388.85 | 349.14  | 465.64  | 5.7                 |
| Microfibril angle ( $M_a$ ; °)             | 1 (SH)                                    | 20.07  | 19.53  | 9.99    | 32.32   | 24.0                |
|                                            | 6 (BH)                                    | 13.90  | 13.54  | 8.09    | 20.69   | 20.9                |
|                                            | 10                                        | 12.98  | 12.79  | 7.49    | 19.71   | 21.1                |
|                                            | 20                                        | 12.96  | 12.73  | 6.71    | 21.36   | 25.3                |
|                                            | 30                                        | 11.47  | 10.95  | 6.33    | 19.23   | 22.7                |
|                                            | 40                                        | 11.62  | 11.18  | 6.94    | 20.33   | 21.4                |
|                                            | 50                                        | 11.25  | 10.92  | 6.24    | 17.84   | 22.6                |
|                                            | 60                                        | 12.47  | 12.04  | 6.97    | 18.66   | 22.6                |
|                                            | 70                                        | 12.54  | 12.25  | 6.84    | 20.23   | 22.6                |
|                                            | 80                                        | 14.11  | 13.92  | 8.91    | 20.95   | 21.6                |
| Modulus of elasticity ( $M_e$ ; GPa)       | 1 (SH)                                    | 10.68  | 10.44  | 5.77    | 17.62   | 21.3                |
|                                            | 6 (BH)                                    | 12.54  | 12.47  | 8.25    | 16.27   | 14.9                |
|                                            | 10                                        | 12.71  | 12.68  | 8.59    | 16.73   | 15.0                |
|                                            | 20                                        | 13.04  | 13.24  | 8.43    | 17.23   | 13.9                |
|                                            | 30                                        | 12.80  | 12.95  | 8.24    | 16.16   | 14.2                |
|                                            | 40                                        | 13.00  | 13.03  | 8.95    | 16.44   | 11.0                |
|                                            | 50                                        | 12.38  | 12.82  | 7.93    | 15.88   | 13.6                |
|                                            | 60                                        | 12.09  | 12.12  | 8.72    | 15.64   | 11.5                |
|                                            | 70                                        | 11.32  | 11.55  | 7.14    | 14.57   | 12.6                |
|                                            | 80                                        | 10.53  | 10.58  | 6.82    | 13.94   | 14.7                |
| Fiber coarseness ( $C_o$ ; µg/m)           | 1 (SH)                                    | 423.40 | 422.80 | 359.73  | 515.78  | 8.0                 |
|                                            | 6 (BH)                                    | 412.12 | 411.11 | 366.38  | 481.86  | 6.8                 |
|                                            | 10                                        | 406.00 | 406.57 | 360.34  | 471.14  | 6.8                 |
|                                            | 20                                        | 408.73 | 410.31 | 355.61  | 481.33  | 7.0                 |

|                                                        |        |        |        |        |        |     |
|--------------------------------------------------------|--------|--------|--------|--------|--------|-----|
|                                                        | 30     | 395.21 | 394.97 | 339.39 | 447.80 | 7.1 |
|                                                        | 40     | 389.41 | 386.08 | 330.61 | 443.90 | 7.1 |
|                                                        | 50     | 383.32 | 383.70 | 328.30 | 455.34 | 7.2 |
|                                                        | 60     | 377.47 | 376.88 | 326.04 | 437.06 | 6.5 |
|                                                        | 70     | 364.59 | 365.13 | 311.38 | 420.67 | 6.3 |
|                                                        | 80     | 348.45 | 351.52 | 306.33 | 407.55 | 6.8 |
| Tracheid wall thickness ( $W_t$ ; $\mu\text{m}$ )      | 1 (SH) | 2.82   | 2.82   | 2.32   | 3.57   | 9.4 |
|                                                        | 6 (BH) | 2.75   | 2.73   | 2.24   | 3.27   | 8.0 |
|                                                        | 10     | 2.70   | 2.66   | 2.35   | 3.16   | 7.6 |
|                                                        | 20     | 2.70   | 2.66   | 2.21   | 3.17   | 7.8 |
|                                                        | 30     | 2.60   | 2.60   | 2.08   | 3.01   | 7.8 |
|                                                        | 40     | 2.57   | 2.55   | 2.18   | 2.98   | 7.8 |
|                                                        | 50     | 2.52   | 2.49   | 2.22   | 2.92   | 7.3 |
|                                                        | 60     | 2.48   | 2.46   | 2.14   | 2.82   | 6.6 |
|                                                        | 70     | 2.40   | 2.37   | 2.17   | 2.77   | 5.9 |
|                                                        | 80     | 2.32   | 2.30   | 2.05   | 2.77   | 6.5 |
| Tracheid radial diameter ( $D_r$ ; $\mu\text{m}$ )     | 1 (SH) | 31.08  | 31.20  | 28.54  | 34.04  | 3.9 |
|                                                        | 6 (BH) | 30.80  | 30.76  | 28.29  | 33.53  | 4.0 |
|                                                        | 10     | 30.80  | 30.90  | 28.51  | 33.00  | 3.7 |
|                                                        | 20     | 30.78  | 30.85  | 28.32  | 33.59  | 3.7 |
|                                                        | 30     | 30.75  | 30.95  | 28.69  | 32.74  | 3.5 |
|                                                        | 40     | 30.56  | 30.67  | 28.14  | 33.32  | 3.9 |
|                                                        | 50     | 30.52  | 30.68  | 27.99  | 32.79  | 3.7 |
|                                                        | 60     | 30.26  | 30.31  | 27.68  | 32.43  | 3.7 |
|                                                        | 70     | 30.02  | 30.18  | 26.44  | 31.97  | 4.1 |
|                                                        | 80     | 29.30  | 29.51  | 26.21  | 31.72  | 4.3 |
| Tracheid tangential diameter ( $D_t$ ; $\mu\text{m}$ ) | 1 (SH) | 27.14  | 27.12  | 25.91  | 28.98  | 2.4 |
|                                                        | 6 (BH) | 27.68  | 27.65  | 26.23  | 29.72  | 2.5 |
|                                                        | 10     | 27.87  | 27.93  | 26.41  | 29.88  | 2.4 |
|                                                        | 20     | 28.17  | 28.14  | 26.30  | 29.66  | 2.6 |
|                                                        | 30     | 28.12  | 28.13  | 26.89  | 30.25  | 2.5 |
|                                                        | 40     | 28.07  | 28.17  | 26.27  | 29.65  | 2.4 |
|                                                        | 50     | 28.10  | 28.16  | 26.53  | 29.72  | 2.5 |
|                                                        | 60     | 28.10  | 28.25  | 26.19  | 29.68  | 2.6 |
|                                                        | 70     | 27.95  | 27.98  | 26.37  | 29.63  | 2.6 |
|                                                        | 80     | 27.61  | 27.51  | 26.07  | 29.19  | 2.7 |
|                                                        | 1 (SH) | 296.75 | 295.00 | 248.26 | 348.17 | 7.6 |
|                                                        | 6 (BH) | 308.75 | 307.59 | 263.87 | 355.27 | 6.6 |

---

|                               |    |        |        |        |        |     |
|-------------------------------|----|--------|--------|--------|--------|-----|
|                               | 10 | 314.34 | 315.79 | 275.60 | 351.46 | 6.4 |
|                               | 20 | 313.91 | 312.87 | 266.20 | 364.80 | 6.4 |
|                               | 30 | 322.73 | 321.36 | 284.39 | 372.46 | 6.4 |
| Specific                      | 40 | 324.72 | 324.49 | 285.61 | 369.76 | 6.6 |
| surface                       | 50 | 328.17 | 327.71 | 287.81 | 366.30 | 6.4 |
| area                          | 60 | 330.90 | 331.12 | 292.30 | 375.38 | 5.7 |
| ( $S_a$ ; m <sup>2</sup> /kg) | 70 | 338.00 | 341.89 | 297.18 | 369.33 | 5.0 |
|                               | 80 | 346.33 | 347.58 | 299.82 | 386.61 | 5.6 |

---

<sup>a,b</sup> as defined in Table S1a.

**Table S2b.** Descriptive statistical summary of the red pine fiber attributes by cross-sectional relative height sampling position.

| Attribute                                  | Relative height class mid-point (%) | Mean   | Median | Minimum | Maximum | CV <sup>a</sup> (%) |
|--------------------------------------------|-------------------------------------|--------|--------|---------|---------|---------------------|
| Wood density ( $W_d$ ; kg/m <sup>3</sup> ) | 7.5                                 | 427.74 | 426.27 | 387.88  | 472.31  | 3.9                 |
|                                            | 22.5                                | 405.86 | 406.26 | 367.18  | 441.74  | 4.3                 |
|                                            | 37.5                                | 387.58 | 385.92 | 363.70  | 418.75  | 4.1                 |
|                                            | 52.5                                | 368.65 | 364.02 | 338.37  | 403.28  | 4.7                 |
|                                            | 67.5                                | 349.69 | 346.52 | 328.99  | 384.40  | 4.0                 |
|                                            | 82.5                                | 344.01 | 342.02 | 313.86  | 395.42  | 6.1                 |
| Microfibril angle ( $M_a$ ; °)             | 7.5                                 | 21.45  | 21.55  | 17.01   | 27.00   | 11.1                |
|                                            | 22.5                                | 11.76  | 11.74  | 7.55    | 17.24   | 17.3                |
|                                            | 37.5                                | 10.79  | 10.13  | 7.78    | 17.72   | 22.2                |
|                                            | 52.5                                | 12.44  | 11.89  | 9.02    | 19.53   | 21.0                |
|                                            | 67.5                                | 13.51  | 13.29  | 9.47    | 18.55   | 15.3                |
|                                            | 82.5                                | 15.79  | 14.99  | 11.64   | 29.06   | 21.5                |
| Modulus of elasticity ( $M_e$ ; GPa)       | 7.5                                 | 10.13  | 10.17  | 7.12    | 12.30   | 10.4                |
|                                            | 22.5                                | 12.96  | 13.10  | 10.09   | 15.31   | 8.6                 |
|                                            | 37.5                                | 12.33  | 12.41  | 9.73    | 14.24   | 10.1                |
|                                            | 52.5                                | 10.82  | 10.78  | 8.22    | 13.11   | 11.6                |
|                                            | 67.5                                | 9.63   | 9.38   | 7.84    | 11.62   | 10.7                |
|                                            | 82.5                                | 8.55   | 8.63   | 5.98    | 10.43   | 12.3                |
| Fiber coarseness ( $C_o$ ; µg/m)           | 7.5                                 | 484.77 | 487.13 | 441.59  | 529.48  | 4.6                 |
|                                            | 22.5                                | 491.44 | 485.82 | 450.32  | 548.12  | 5.0                 |
|                                            | 37.5                                | 476.53 | 473.74 | 430.94  | 522.38  | 4.9                 |
|                                            | 52.5                                | 449.24 | 442.10 | 399.27  | 514.74  | 6.3                 |
|                                            | 67.5                                | 418.15 | 414.14 | 372.28  | 474.62  | 5.3                 |
|                                            | 82.5                                | 368.53 | 363.30 | 310.74  | 452.23  | 9.2                 |
| Tracheid wall thickness ( $W_t$ ; µm)      | 7.5                                 | 2.89   | 2.89   | 2.58    | 3.22    | 4.6                 |
|                                            | 22.5                                | 2.82   | 2.81   | 2.56    | 3.13    | 5.1                 |
|                                            | 37.5                                | 2.69   | 2.65   | 2.51    | 2.97    | 4.9                 |
|                                            | 52.5                                | 2.52   | 2.45   | 2.34    | 2.86    | 5.9                 |
|                                            | 67.5                                | 2.35   | 2.34   | 2.16    | 2.65    | 5.0                 |
|                                            | 82.5                                | 2.18   | 2.15   | 1.94    | 2.65    | 8.2                 |
|                                            | 7.5                                 | 34.40  | 34.28  | 31.94   | 36.03   | 2.7                 |

|                                                          |      |        |        |        |        |     |
|----------------------------------------------------------|------|--------|--------|--------|--------|-----|
|                                                          | 22.5 | 35.09  | 35.15  | 33.33  | 36.64  | 2.6 |
| Tracheid radial diameter ( $D_r$ ; $\mu\text{m}$ )       | 37.5 | 35.58  | 35.65  | 34.14  | 37.39  | 2.5 |
|                                                          | 52.5 | 35.61  | 35.76  | 32.60  | 37.75  | 2.9 |
|                                                          | 67.5 | 35.44  | 35.39  | 33.74  | 37.52  | 2.3 |
|                                                          | 82.5 | 33.18  | 33.02  | 29.36  | 35.23  | 4.3 |
|                                                          | 7.5  | 29.33  | 29.37  | 27.67  | 30.62  | 1.8 |
|                                                          | 22.5 | 31.21  | 31.16  | 30.08  | 32.52  | 1.9 |
| Tracheid tangential diameter ( $D_t$ ; $\mu\text{m}$ )   | 37.5 | 31.31  | 31.24  | 30.09  | 32.43  | 2.0 |
|                                                          | 52.5 | 30.88  | 31.05  | 29.55  | 32.30  | 2.3 |
|                                                          | 67.5 | 30.31  | 30.34  | 28.82  | 31.66  | 2.0 |
|                                                          | 82.5 | 28.70  | 28.96  | 27.14  | 29.64  | 2.5 |
|                                                          | 7.5  | 276.96 | 275.45 | 253.91 | 302.60 | 3.7 |
|                                                          | 22.5 | 287.89 | 287.87 | 263.54 | 311.61 | 4.1 |
| Specific surface area ( $S_a$ ; $\text{m}^2/\text{kg}$ ) | 37.5 | 297.24 | 297.70 | 272.02 | 318.89 | 3.7 |
|                                                          | 52.5 | 309.08 | 315.19 | 275.58 | 328.68 | 4.6 |
|                                                          | 67.5 | 325.90 | 327.52 | 289.03 | 350.74 | 4.0 |
|                                                          | 82.5 | 347.37 | 351.86 | 295.36 | 386.12 | 6.5 |

<sup>a</sup> As defined in Table S1a.
